# Supplementary material
Source: PubMed Central journal article supplement (PMC6051912)
Supplement: NIHMS963267-supplement.pdf [file NIHMS963267-supplement.pdf]

## Supplemental Figures and Figure Legends

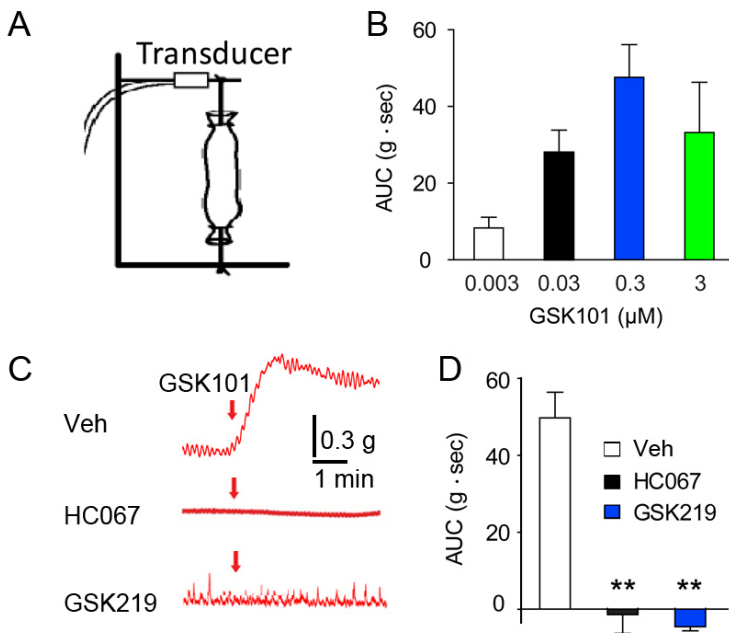

### Figure S1, related to Figure 1, Selective activation of TRPV4 regulates GI motility.

(A) Schematic of the contractility recording apparatus using colon strips.

(B) Quantification of GSK101-elicited contractile responses in colon strips from *Trpv4*<sup>+/+</sup> mice exposed to increasing concentrations of GSK101. n=16 segments from 4 mice per group.

(C-D) Representative traces (C) and quantification (D) of GSK101-induced colon contraction in the presence of the TRPV4 antagonists HC067 (3 μM) or GSK219 (0.3 μM). n= 16 segments from 4 mice per group.

All data are pooled from two to three independent experiments. Data are mean ± SEM. Statistical significance was determined using one-way ANOVA with Tukey's post-test (D). \*\* p<0.01.

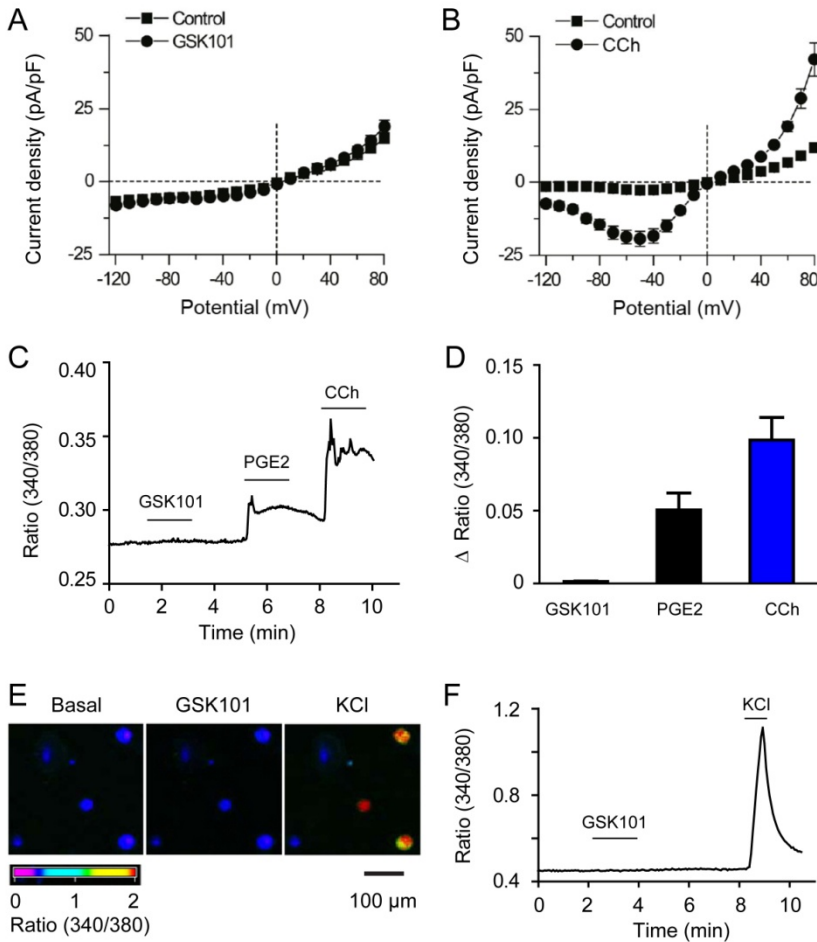

**Figure S2, related to Figure 3, Enteric neurons and SMCs are unresponsive to TRPV4 stimulation.**

(A-B) Averaged membrane currents at holding potentials from -120 mV to +80 mV (10 mV steps) before and after the application of GSK101 (0.3 μM, n=9 cells) (A) or CCh (50 μM, n=13 cells) (B).

(C) Averaged time lapse trace showing the [Ca<sup>2+</sup>]<sub>i</sub> responses elicited by GSK101 (0.3 μM), PGE2 (30 μM), and CCh (10 μM) in freshly isolated intestinal SMCs from one cover slip.

(D) Quantification of changes in 340/380 ratio elicited by GSK101, PGE2, or CCh. n=5 coverslips.

(E) Representative images showing [Ca<sup>2+</sup>]<sub>i</sub> responses in dissociated myenteric neurons elicited by GSK101 (0.2 μM) and KCl (100 mM).

(F) Averaged time-lapse trace showing [Ca<sup>2+</sup>]<sub>i</sub> responses of myenteric neurons in response to GSK101 (0.2 μM) and KCl (100 mM) from one cover slip. KCl was used as a positive control.

All data are pooled from three independent experiments.

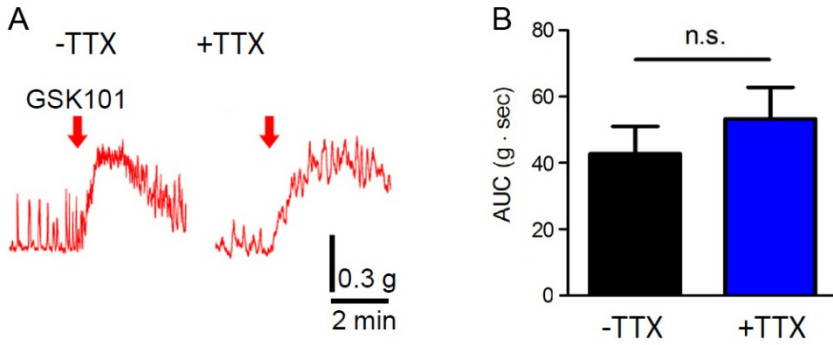

**Figure S3, related to Figure 3, TRPV4-mediated colon contraction is not reduced by blocking enteric neurotransmission.**

(A-B) Representative traces (A) and quantification (B) of GSK101-induced colon contractions in the absence and presence of TTX (0.3  $\mu$ M). n=12 segments from 3 mice.

All data are pooled from three independent experiments. Data are mean  $\pm$  SEM. Statistical significance was determined using Student's t-test (B). n.s., not significant.

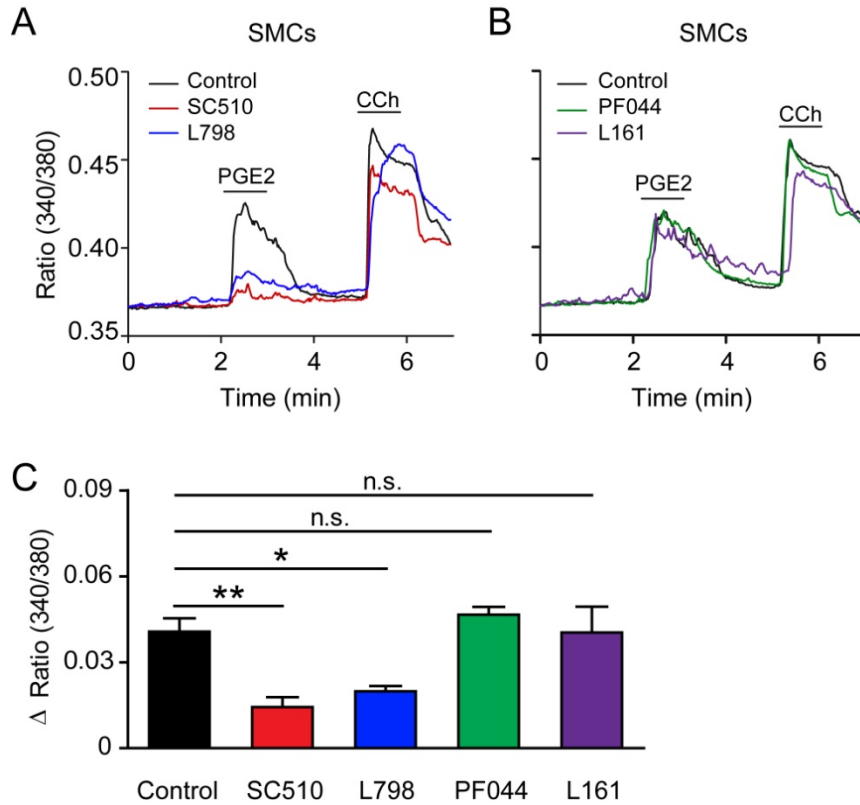

**Figure S4, related to Figure 5, PGE2 evokes smooth muscle cell response via EP1/3 receptors.**

(A) Averaged  $[Ca^{2+}]_i$  response induced by PGE2 (30  $\mu$ M) in the absence and presence of the EP1 antagonist SC510 (red line, 5  $\mu$ M) or EP3 antagonist L798 (blue line, 3  $\mu$ M) in freshly isolated intestinal SMCs. CCh was used as a positive control.

(B) Averaged  $[Ca^{2+}]_i$  response induced by PGE2 in the absence and presence of the EP2 antagonist PF044 (red line, 0.3  $\mu$ M) or EP4 antagonist L161 (blue line, 0.3  $\mu$ M) in freshly isolated intestinal SMCs. CCh was used as a positive control.

(C) Quantification of PGE2-induced  $[Ca^{2+}]_i$  response in the absence or presence of EP1 and EP3 antagonists or EP2 and EP4 antagonists.  $n=5$  coverslips per group.

All data are pooled from two to three independent experiments. Data are mean  $\pm$  SEM. Statistical significance was determined using one-way ANOVA with Tukey's post-test (C). \*  $p<0.05$ , \*\*  $p<0.01$ , n.s., not significant.

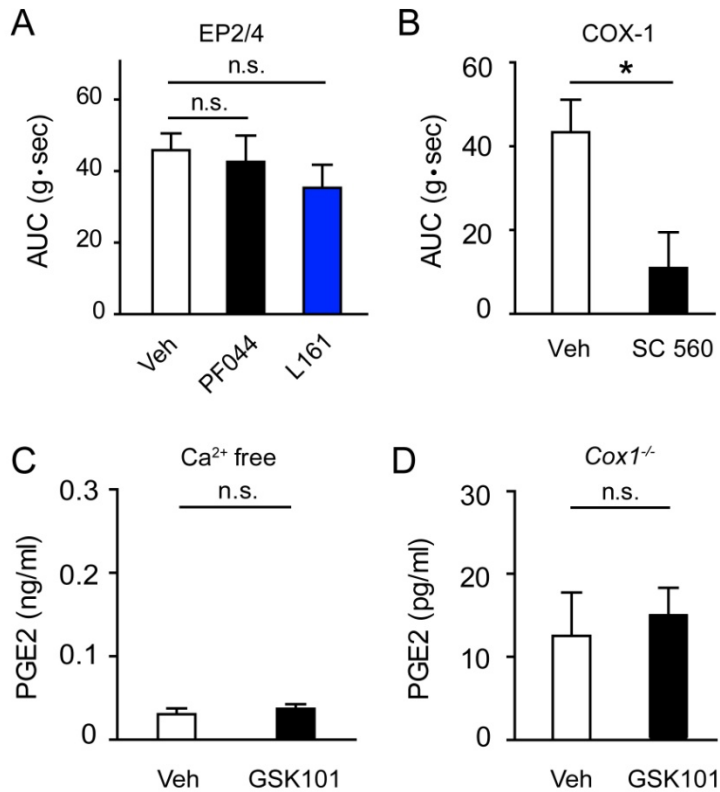

**Figure S5, related to Figure 5, TRPV4-mediated colon contraction involves PGE2 signaling.**

(A) GSK101 (0.3  $\mu$ M)-induced colon contraction in the presence of EP2 antagonist (PF044, 0.3  $\mu$ M) and EP4 antagonist (L161, 0.3  $\mu$ M). n=16 segments from 4 mice per group.

(B) GSK101-induced colon contraction in the presence of pharmacologic COX-1 inhibition by SC 560 (0.1  $\mu$ M) in *wt* mice. n=12 segments from 3 mice per group.

(C) GSK101-induced PGE2 release in a Ca<sup>2+</sup>-free extracellular buffer from MMs. n=5 mice.

(D) GSK101-induced PGE2 release in MMs from COX-1 KO mice. n=5 mice per group.

\* p<0.05; \*\* p<0.01; n.s., not significant.

All data are pooled from two to three independent experiments. Data are mean  $\pm$  SEM. In this figure, statistical significance was determined using one-way ANOVA with Tukey's post-test (A) and Student's t-test (B, C, and D). \* p<0.05, n.s., not significant.
